# Supplementary material for: A dual-mode foam sensor employing Ti3C2Tx/In2O3 composites for NH3 detection with memory function and body movement monitoring for kidney disease diagnosis
Source: Royal Society of Chemistry journal article supplement (doi:10.1039/d3ta05670h), 2023-01-01
Supplement: d3ta05670h1.pdf [file d3ta05670h1.pdf]

**A Dual-Mode Foam Sensor Employing  $\text{Ti}_3\text{C}_2\text{T}_x/\text{In}_2\text{O}_3$  Composites for  
 $\text{NH}_3$  Detection with Memory Function and Body Movement  
Monitoring for Kidney Disease Diagnosis**

Zitong Kan<sup>a</sup>, Fangyu Shi<sup>c</sup>, Long Yang<sup>a</sup>, Qingqing Zhou<sup>a</sup>, Yuhong Zhang<sup>a</sup>, Yu Qi<sup>a</sup>, Huan Zhang<sup>a</sup>, Biao Dong<sup>a</sup>, Luquan Ren<sup>b</sup>, Hongwei Song<sup>a</sup>, Lin Xu<sup>\*a, b</sup>

<sup>a</sup>State Key Laboratory on Integrated Optoelectronics, College of Electronic Science and Engineering, Jilin University, 2699 Qianjin Street, Changchun, 130012, People's Republic of China.

<sup>b</sup>Key Laboratory of Bionic Engineering Ministry of Education, College of Biological and Agricultural Engineering, Jilin University, Changchun, 130025, People's Republic of China.

<sup>c</sup>Department of Prosthodontics, Jilin Provincial Key Laboratory of Sciences and Technology for Stomatology Nanoengineering, School and Hospital of Stomatology, Jilin University, Changchun, 130021, China.

\*Corresponding author.

E-mail addresses: [linxu@jlu.edu.cn](mailto:linxu@jlu.edu.cn) (L. Xu).

## 1. Experimental section

### 1.1 Materials

$\text{Ti}_3\text{AlC}_2$  was obtained from Jilin 11 Technology Co. (3-aminopropyl) triethoxysilane (APTES) and LiF were purchased from Shanghai Macklin Biochemical Technology Co. Hydrochloric acid,  $\text{In}(\text{NO}_3)_3 \cdot 4.5\text{H}_2\text{O}$ , and N,N-Dimethylformamide (DMF) were purchased from China National Pharmaceutical Chemical Reagent Co. Polyvinyl pyrrolidone (PVP) was obtained from Aladdin Reagent (Shanghai) Co. Multi-walled carbon nanotubes were purchased from Nanjing Xianfeng Nanomaterials Technology Co. Thermoplastic polyurethane elastomer (TPU) was obtained from Suzhou Liu Yuqi Plastic Chemical Co. The flat electrodes used in this work were purchased from the Yu Xin Fork Finger Electrode Store. The standard  $\text{NH}_3$  (1000 ppm) used in this experiment was purchased from Dalian Dart Gas Co., Ltd. All chemicals were of analytical grade and used without further purification. The water used in all experiments was purified using a Millipore system.

### 1.2 Preparation of $\text{Ti}_3\text{C}_2\text{T}_x$ nanoflakes

$\text{Ti}_3\text{C}_2\text{T}_x$  MXene nanoflakes were synthesized through a process involving the etching of the  $\text{Ti}_3\text{AlC}_2$  bulk phase with LiF/HCl and subsequent ultrasound-assisted delamination. Initially, 2 g of LiF was added to 20 mL of 9 M HCl and stirred at 35°C in a water bath for 15 minutes. Once the LiF was completely dissolved, 1 g of  $\text{Ti}_3\text{AlC}_2$  was gradually introduced into the mixed solution and further stirred in a water bath at 35°C for 24 h. After the reaction, the product was washed via centrifugation until the supernatant reached a neutral pH. Subsequently, the precipitate was dispersed in water and subjected to 1 hour of sonication in an ice bath. To eliminate any unetched  $\text{Ti}_3\text{AlC}_2$  and multilayered  $\text{Ti}_3\text{C}_2\text{T}_x$  MXene that hadn't undergone sonication and layering, the mixed solution was centrifuged at 3500 r/min for 30 minutes, and the resulting supernatant was collected. The concentration of the  $\text{Ti}_3\text{C}_2\text{T}_x$  nanoflakes colloidal solution was determined by weighing the solute mass in the 10 mL solution obtained through filtration. The concentration of the colloidal solution was maintained at 4 mg/mL.

### **1.3 Preparation of In<sub>2</sub>O<sub>3</sub> nanotubes**

In<sub>2</sub>O<sub>3</sub> nanotubes were synthesized using PVP as a sacrificial template via electrostatic spinning. Initially, 0.6 g of In(NO<sub>3</sub>)<sub>3</sub>·4.5H<sub>2</sub>O was dissolved in 10 mL of DMF and magnetically stirred for 2 h. Subsequently, 1.66 g of PVP powder was added and vigorously stirred for 10 h to obtain a colorless precursor solution suitable for electrostatic spinning. The prepared precursor solution was then loaded into a 10 mL syringe and extruded through a metal nozzle connected to a high voltage power supply at a rate of 0.04 mm/min. During the electrostatic spinning process, an applied voltage of 15 kV was used, and the distance between the metal needle and the electrostatic grounding collector was set at 17 cm. Finally, after drying in a drying tower for 12 h, the spun nanofibers were calcined in air at a heating rate of 1°C/min for 180 min at 600°C, resulting in the formation of In<sub>2</sub>O<sub>3</sub> nanotubes.

### **1.4 Preparation of TPU foams**

TPU foams were prepared using the salt template method. Initially, 10 g of TPU pellets were mixed with 40 mL of DMF and stirred at 70°C for 48 h to ensure complete dissolution of the TPU. Subsequently, 100 mg of multi-walled carbon nanotube powder was added and stirred for 4 h to achieve a uniform distribution within the TPU system. Then, 37.8 g of NaCl powder was added and manually stirred before being placed in an oven at 80°C to facilitate complete solvent evaporation. Finally, the NaCl powder was washed out of the system with hot water and dried to obtain the TPU foam. The resistance of the foam was measured using a resistance meter to verify its disconnection when no sensing material was loaded.

### **1.5 Characterization**

The scanning electron microscopy (SEM) images were captured using a JSM-6700F electron microscope (JEOL, Japan). Transmission electron microscopy (TEM) images were obtained using a JEM-2100F transmission electron microscope (JEOL, Japan) with an accelerating voltage of 200 kV. X-ray diffraction (XRD) patterns were obtained using a Rigaku TTR III X-ray diffractometer (Tokyo, Japan) with a monochromatized Cu target as the radiation source. Raman spectroscopy was conducted with a LabRAM HR Evolution instrument (Jobin-yvon, Horiba, France)

excited by a He-Ne laser operating at a wavelength of 532 nm. Fourier transform infrared (FT-IR) spectra were recorded using a PerkinElmer spectrometer, covering the range of 400 to 4000  $\text{cm}^{-1}$ . X-ray photoelectron spectroscopy (XPS) measurements were performed using an ESCALAB MK II X-ray photoelectron spectrometer to analyze the composition of C, O, Ti, and In elements.

### 1.6 $\text{NH}_3$ sensing performance measurement

In this study, the evaluation of  $\text{NH}_3$  sensing performance was carried out at a relative humidity of 30%, and the test system is shown in Fig. S1. The system comprises a digital multimeter (Fluke 8846A) and two 1L glass vials. The Fluke 8846A is equipped with an internal power supply of 5V specifically for resistance measurements. One glass vial contains air, while the other vial holds the target gas for measurement. In the breath test experiment,  $\text{NH}_3$  is diluted to 1.5 ppm using the breath of a healthy person. Subsequently, one glass bottle (1L) is filled with ambient air, while the other glass bottle (1L) contains  $\text{NH}_3$  diluted with the exhaled breath. Initially, the sensor is placed in the glass vial containing air, allowing its resistance to stabilize. Subsequently, the sensor is promptly transferred to the glass vial containing the target gas for measurement. The change in resistance is continuously recorded in real-time using the Fluke 8846A digital multimeter. The response value of the sensor to  $\text{NH}_3$  ( $R_1$ ) is defined by equation (1), where  $R_g$  and  $R_0$  are the resistance of the device in the target gas and air respectively.

$$R_1 = \frac{R_g - R_0}{R_0} \times 100\% \dots\dots\dots(1)$$

### 1.7 Pressure sensing performance measurement

During the pressure test, a linear motor (LPS-1) is utilized to apply a specific pressure to the sensor. The sensor is positioned between the two squeeze plates of the linear motor, ensuring complete coverage. The software accompanying the linear motor allows for adjustment of test conditions such as pressure and frequency. To monitor real-time changes in the sensor's resistance, a digital multimeter (Fluke 8846A) is connected to the sensor using wires positioned at the top and bottom. The pressure

response ( $R_2$ ) is calculated using Equation (2), where  $\Delta R$  represents the steady resistance change between the pressure release and loading states, and  $R_0$  denotes the steady resistance of the sensor without pressure loading. In addition, the response and recovery time of the pressure was measured using an electrochemical workstation (CHI-660E, Shanghai Chenhua Apparatus Co., Shanghai, China).

$$R_2 = \frac{\Delta R}{R_0} \times 100\% \dots\dots\dots(2)$$

The response / recovery time are defined as the time duration from the initial resistance value to 90% of the final equilibrium state.

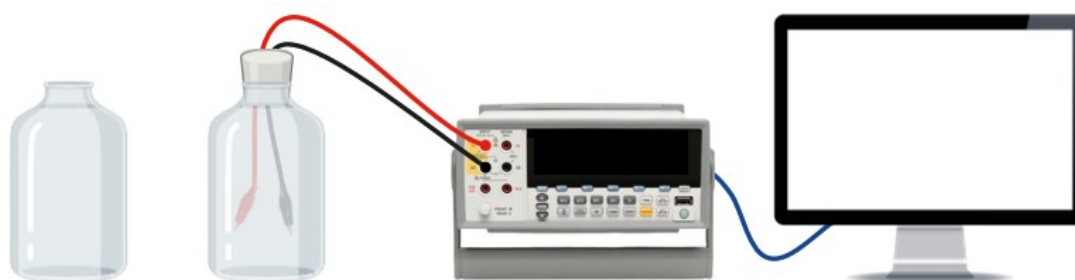

Figure S1. Schematic diagram of the gas sensing test system.

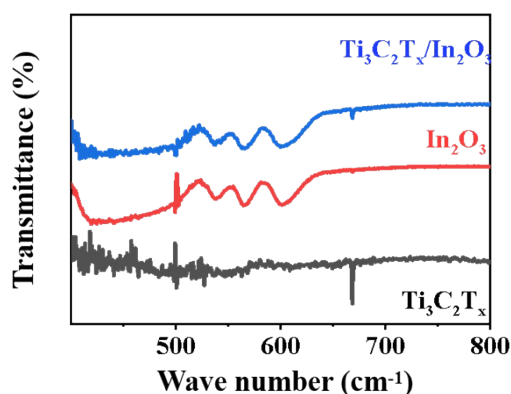

Figure S2. FTIR of  $Ti_3C_2T_x$  nanoflakes,  $In_2O_3$  nanotubes,  $Ti_3C_2T_x/In_2O_3$  composites in the wave number range of 400-800  $cm^{-1}$ .

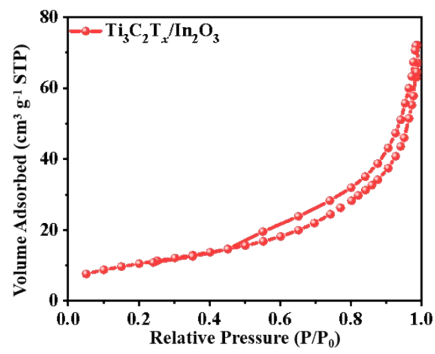

Figure S3. N<sub>2</sub> isothermal adsorption/desorption curve of Ti<sub>3</sub>C<sub>2</sub>T<sub>x</sub>/In<sub>2</sub>O<sub>3</sub> composites.

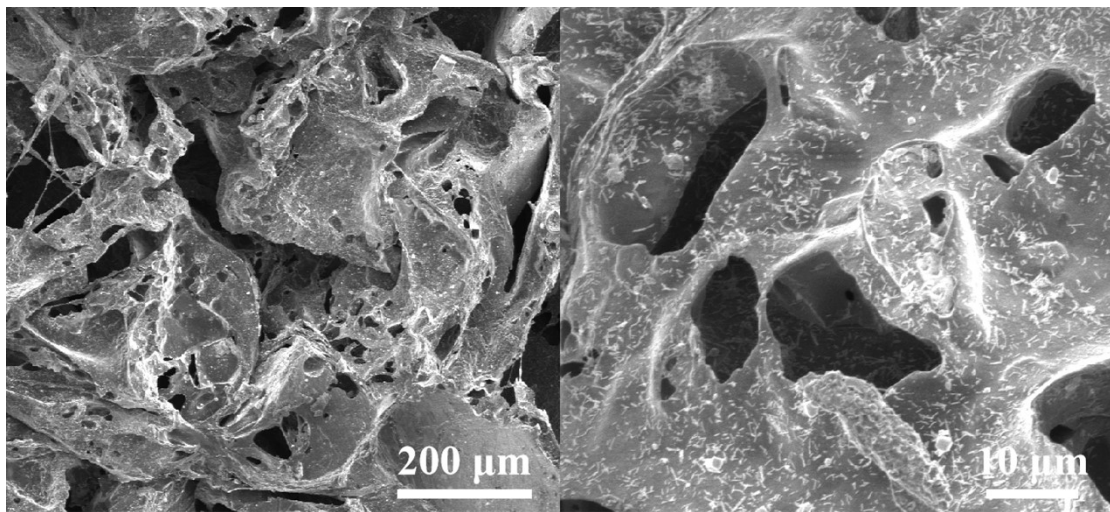

Figure S4. SEM image of Ti<sub>3</sub>C<sub>2</sub>T<sub>x</sub>/In<sub>2</sub>O<sub>3</sub> foam sensor in different scale.

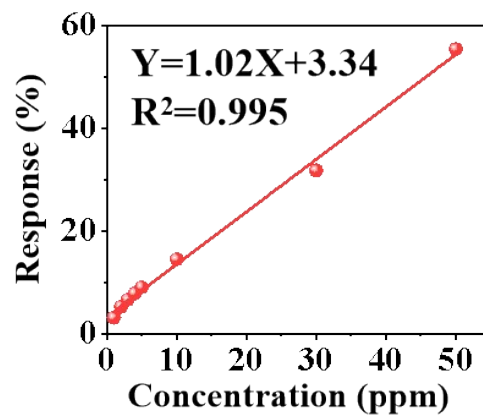

Figure S5. Linear plot of Ti<sub>3</sub>C<sub>2</sub>T<sub>x</sub>/In<sub>2</sub>O<sub>3</sub> foam sensor: response values versus NH<sub>3</sub> gas concentration.

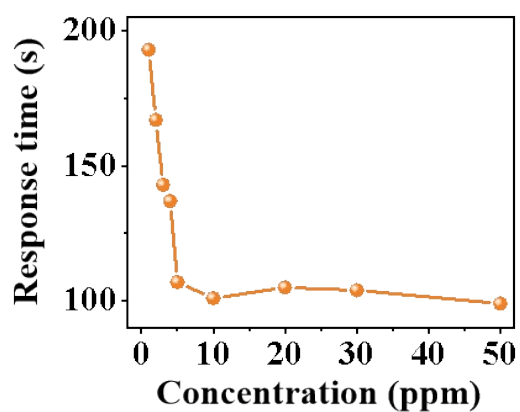

Figure S6. Response time of  $\text{Ti}_3\text{C}_2\text{T}_x/\text{In}_2\text{O}_3$  foam sensor to  $\text{NH}_3$  gas in different concentrations.

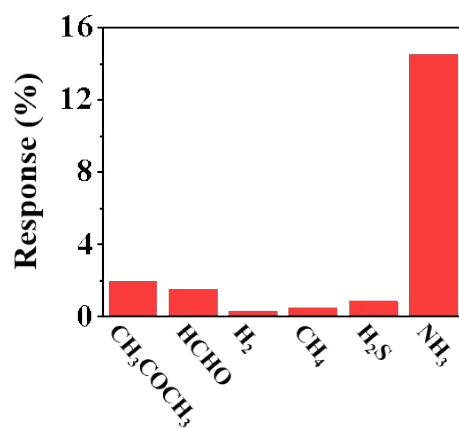

Figure S7. Selectivity of  $\text{Ti}_3\text{C}_2\text{T}_x/\text{In}_2\text{O}_3$  foam sensor for various common breath gases at a concentration of 10 ppm.

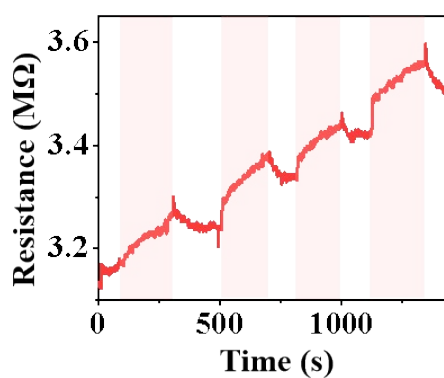

Figure S8. Four consecutive injections of 1.5 ppm  $\text{NH}_3$  gas into the  $\text{Ti}_3\text{C}_2\text{T}_x/\text{In}_2\text{O}_3$  foam sensor.

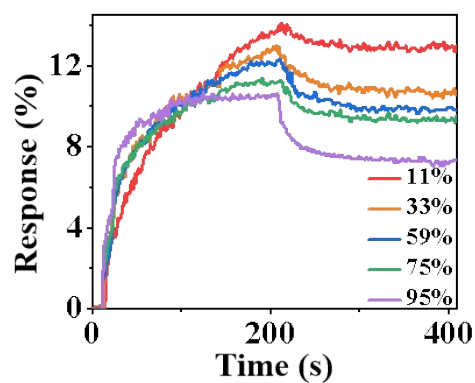

Figure S9. Dynamic response curves of  $\text{Ti}_3\text{C}_2\text{T}_x/\text{In}_2\text{O}_3$  foam sensors to 5 ppm  $\text{NH}_3$  at different humidity levels.

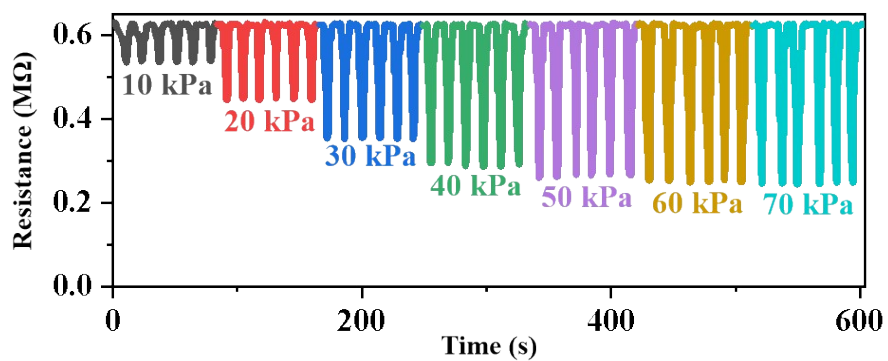

Figure S10. The dynamic response curve of the  $\text{Ti}_3\text{C}_2\text{T}_x$  foam sensor to different pressures.



Table S1. Comparison of NH<sub>3</sub> gas sensing performance of some typical MXene based NH<sub>3</sub> gas sensor in comparison with the as-proposed planer Ti<sub>3</sub>C<sub>2</sub>T<sub>x</sub>/In<sub>2</sub>O<sub>3</sub> in this work at room temperature.

| <b>materials</b>                                                              | <b>Conc.</b> | <b>Tres/Trec</b> | <b>Response</b> | <b>Ref.</b> |
|-------------------------------------------------------------------------------|--------------|------------------|-----------------|-------------|
| Metallic Ti <sub>3</sub> C <sub>2</sub> T <sub>x</sub>                        | 100 ppm      | 5/10 min         | 0.8%            | 1           |
| MXene/SnO <sub>2</sub>                                                        | 50 ppm       | 36/44 s          | 40%             | 2           |
| MXene/TiO <sub>2</sub>                                                        | 10 ppm       | 60/750 s         | 3.1%            | 3           |
| Ti <sub>3</sub> C <sub>2</sub> T <sub>x</sub> /SnO                            | 10 ppm       | 61/119 s         | 67%             | 4           |
| PEDOT:PSS/MXene                                                               | 100 ppm      | 116/40 s         | 36.6%           | 5           |
| CPAM/Ti <sub>3</sub> C <sub>2</sub> T <sub>x</sub>                            | 200 ppm      | 12.7/14.6 s      | 12.7/14.6%      | 6           |
| Mxene/GO/CuO/ZnO                                                              | 100 ppm      | 26/25 s          | 59.9%           | 7           |
| Ti <sub>3</sub> C <sub>2</sub> T <sub>x</sub> /In <sub>2</sub> O <sub>3</sub> | 50 ppm       | 34/337s          | 86%             | This work   |

Where Tres/Trec is the response/recovery times; Conc.: Concentration; Ref.: Reference.

## REFERNCES

1. S. J. Kim, H. J. Koh, C. E. Ren, O. Kwon, K. Maleski, S. Y. Cho, B. Anasori, C. K. Kim, Y.-K. Choi, J. Kim, Y. Gogotsi and H. T. Jung, *Acs Nano*, 2018, **12** (2), 986-993.
2. T. T. He, W. Liu, T. Lv, M. S. Ma, Z. F. Liu, A. Vasiliev and X. G. Li, *Sens. Actuators, B*, 2021, **329**, 129275.
3. H. L. Tai, Z. H. Duan, Z. Z. He, X. Li, J. L. Xu, B. H. Liu and Y. D. Jiang, *Sens. Actuators, B*, 2019, **298**, 126874.
4. L. J. Yao, X. Tian, X. X. Cui, R. J. Zhao, M. J. Xiao, B. S. Wang, X. C. Xiao, Y. D. Wang, *Sens. Actuators, B*, 2022, **358**, 131501.
5. L. Jin, C. L. Wu, K. Wei, L. F. He, H. Gao, H. X. Zhang, K. Zhang, A. M. Asiri, K. A. Alamry, L. Yang and X. F. Chu, *ACS Appl. Nano Mater.*, 2020, **3** (12), 12071-12079.
6. L. J. Zhao, Y. Q. Zheng, K. Wang, C. Lv, W. Wei, L. L. Wang and W. Han, *Adv. Mater. Technol.*, 2020, **5** (7), 2000248.
7. L.J Yao, X. Tian, X. X. Cui, R. J. Zhao, M. J. Xiao, B. S. Wang, X. C. Xiao, Y. D. Wang, *Sens. Actuators, B*, 2022, **358**,131501.
